1 **Response of *Endozoicomonas montiporae* to heat stress and coral host**

2 **lysates**

3 **Ya-fan Chan<sup>1</sup>, Chia-Yu Chen<sup>2</sup>, Chih-Ying Lu<sup>2</sup>, Yung-Chi Tu<sup>2</sup>, Kshitij Tandon<sup>2</sup>,**

4 **Shinya Shikina<sup>3,4</sup> and Sen-Lin Tang<sup>2#</sup>**

5

6 <sup>1</sup>Department of Microbiology, Soochow University, Taipei 11101, Taiwan

7 <sup>2</sup>Biodiversity Research Center, Academia Sinica, Taipei 115, Taiwan

8 <sup>3</sup>Institute of Marine Environment and Ecology, National Taiwan Ocean University,

9 Keelung, Taiwan

10 <sup>4</sup>Center of Excellence for the Oceans, National Taiwan Ocean University, 2 Pei-Ning

11 Rd, Keelung, 20224, Taiwan

12

13

14

15

16

17

18 # Corresponding author

19 Corresponding author Email: [sltang@gate.sinica.edu.tw](mailto:sltang@gate.sinica.edu.tw)

20

21

22

23

24 **Abstract**

25 *Endozoicomonas*, a core bacterial group in corals, may also be a coral symbiont.  
26 *Endozoicomonas* communities often decrease rapidly in corals under heat stress.  
27 However, how the bacteria respond to changes in temperature and coral host during  
28 heat stress is unknown. Here, we employed the cultivable, dominant species *E.*  
29 *montiporae* as a working organism to explore how *Endozoicomonas* responds to heat  
30 stress. We designed two experiments to clarify the extent to which *E. montiporae* is  
31 influenced by temperature and coral host. We detected differentially expressed protein  
32 (DEP) profiles in this bacterium at 31°C and 33°C compared to 25°C by tandem mass  
33 tags-based quantitative proteome analysis. Fifty DEPs, including many heat shock  
34 proteins, were detected when the temperature changed. The expression of antioxidant  
35 defense proteins and key pyruvate synthase proteins decreased, suggesting that *E.*  
36 *montiporae* were in a physiology of stress at 33°C. Furthermore, some proteins were  
37 differentially expressed because of the heat-stress-treated coral lysate specifically,  
38 suggesting that not only heat but also heat-induced host factors can affect the protein  
39 expression of the bacterium. This study provides an in-depth analysis of how the  
40 molecular mechanisms of *Endozoicomonas* are affected by heat stress and coral host.  
41

## 42 **Introduction**

43 Temperature is a crucial factor governing coral physiology [1]. When the  
44 seawater temperature increases, heat stress impacts not only the coral host but also all  
45 of the coral microbial partners in the coral holobiont [2]. The most typical example is  
46 that coral-algae symbiosis can be dissociated by high temperature [3, 4]. Along with  
47 symbiotic algae, the impact of heat stress on the coral bacteria has recently received  
48 increasing attention due to these bacteria's indispensable ecological contribution to  
49 coral hosts [5-7].

50 Bacteria in the coral holobiont are highly sensitive to heat stress. For instance,  
51 Ziegler et al. [8] demonstrated that coral bacteria were significantly affected by 20 h  
52 of incubation. Similarly, Lee et al. [9] showed rapid changes in the coral bacteria  
53 between coral mucus and tissue within a day. Moreover, Shiu et al. [10] even showed  
54 that the coral bacterial community quickly changed from normal to pathogenic- or  
55 stress-associated microbiota within 12 h of a short-term heat stress experiment,  
56 whereas the density and photosynthetic efficiency (Fv/Fm) of *Symbiodiniaceae*  
57 remained unchanged.

58 Although heat stress usually elicits a clear shift in bacterial community, we still  
59 do not know how coral bacteria respond to heat stress, or their underlying  
60 biochemical or molecular mechanisms. This is because it is difficult to detect the  
61 response of a specific bacterial group in corals, as many studies have shown that  
62 coral-associated bacterial communities are diverse and dynamic in various corals with  
63 environmental variations. Hence there is a need to establish a bacterial manipulable  
64 model to explain in-depth physiological and biochemical characteristics that change  
65 when bacteria are exposed to specific biotic or abiotic factors. A similar idea was also  
66 proposed recently by van Oppen and Blackall [11]: using pure bacterial cultures for  
67 molecular approaches could provide insights into the in-depth, molecular mechanisms  
68 of coral bacteria and their interactive relationships with their coral host under a  
69 specific environmental condition, such as heat stress. Gao [12] used a cultivable coral  
70 pathogenic bacterium, *Vibrio coralliilyticus*, to investigate transcriptional responses  
71 when bacteria interact with coral mucus, and furthermore to elucidate a potential  
72 behavior and infection mode of the *V. coralliilyticus* that helps explain the  
73 pathogenesis of *V. coralliilyticus* and coral disease. However, there is no coral-health  
74 associated bacterial working model available for such an advanced study.

75 To establish the working model, the first need is to find an appropriate coral  
76 bacterium strain that may represent specific functionally important or dominant  
77 bacteria in the coral microbiota. Of the vast number of coral bacteria, the genus  
78 *Endozoicomonas* (*Gammaproteobacteria*, *Oceanospirillales*, *Hahellaceae* or  
79 *Endozoicomonaceae*) is the best studied and is recognized to be a functionally  
80 important, dominant bacterium in the core microbiome of various Scleractinian  
81 corals, such as common species of *Acropora*, *Stylophora*, *Pocillopora* and *Porites*  
82 [13-16]. *Endozoicomonas* has long been suggested to be a potential bacterial  
83 symbiont [2, 17]. Hence, it is a suitable bacterium for establishing such a working  
84 model. To date, there are only three cultivable *Endozoicomonas* species isolated from  
85 Scleractinian corals: *E. montiporae*, *E. acroporae* Acr-14<sup>T</sup>, and *E. coralli* [18-20]. Of  
86 them, only *E. montiporae* (*E. montiporae* CL-33<sup>T</sup>) has had its complete genome  
87 sequenced. The genomic features also indicate that *E. montiporae* is a facultative  
88 symbiont [21, 22].

89 Furthermore, in Lee et al. [9], *E. montiporae* prevailed in *Acropora* sp., and the  
90 former's relative abundance decreased rapidly in the latter—from 80% to less than  
91 20%—when the temperature was increased to 31°C and 33°C. A shift in the  
92 associated bacterial community (the *E. montiporae* was the second most dominant in  
93 the community) happened in the coral mucus when the sugar composition of coral  
94 mucus was altered by heat stress [23]. Based on these tight relationships between  
95 coral host and this bacterium, we believed that *E. montiporae* is the most suitable  
96 model microorganism for developing a working model to investigate the in-depth  
97 molecular physiological response of coral bacteria under heat stress [10].

98 In this study, we used *E. montiporae* as a model organism and detected  
99 differentially expressed protein profiles of this bacterium *in vitro* at two high  
100 temperatures, 31°C, and 33°C, based on the previous study [9]. Furthermore, we  
101 assumed that some of the heat stress-induced responses in the bacterium can be  
102 affected not only directly by temperature but also indirectly by the host factors, also  
103 induced by heat stress. Thus, the differentially expressed protein profiles of the  
104 bacteria were also detected by co-incubating with coral lysates after high temperature  
105 treatments. We found that temperature was the main factor explaining the changes in  
106 most proteins of *E. montiporae*. However, some proteins were affected by factors of

107 temperature-induced coral lysates. Further discussion is provided on the molecular  
108 response of the specific coral bacterium under heat stress and influence from heat-  
109 induced coral hosts.

## 110 **Materials and Methods**

### 111 **Bacteria culture inoculation**

112 *E. montiporae* CL-33<sup>T</sup> was cultivated in an MMBv4 medium at 25°C on a shaker  
113 with 200 rpm as previously described [21].

### 114 **Experimental design for heat stress experiment**

115 The initial *E. montiporae* CL-33<sup>T</sup> culture was grown at 25°C to an optical  
116 density at 600 nm (OD) of 0.6, and then diluted 1/200 in total of nine Falcon  
117 centrifuge tubes with 20 mL fresh MMBv4 medium [21]. Nine bottles were incubated  
118 at 25°C, 31°C and 33°C (n=3 for each temperature) (Fig. 1A). Bacterial growth was  
119 monitored by a spectrophotometer, measuring the OD value after 16, 24 and 48 h  
120 from each tube. A 1 mL subsample from each cultural bottle was centrifuged at 9,000  
121 g at 4°C. After discarding the supernatant, the pellet was washed with 1 mL 1X  
122 phosphate-buffered saline (PBS) three times. A total of 27 sample tubes were flash-  
123 frozen using liquid nitrogen immediately and stored at -80°C until total protein  
124 extraction.

### 125 **Experimental designing for coral lysate experiment**

126 To test the protein profiles of *E. montiporae* co-incubating with coral lysates, we  
127 prepared and placed coral lysates into dialysis tubing (D9777, 14 kDa for molecular  
128 weight cutoff; Sigma, Aldrich, USA) and co-incubated the dialysis tubing in the  
129 bacterial culture at a specific temperature. The details of the experiment are described  
130 in the following paragraphs.

131 For the dialysis tubing preparation, the tubing was cut into 25-cm long pieces,  
132 boiled in the washing solution (1 mM EDTA, 0.2% w/v sodium bicarbonate) for 10  
133 mins and washed three times with sterilized water. The treated tubing was then moved  
134 into another glass bottle with boiled-EDTA solution (1 mM, pH=8.0) for 10 mins.  
135 The tubing was stored at 4°C until use.

136 To prepare the coral lysate, nubbins of the coral *Acropora* spp. (about 3 cm long  
137 for each) were collected from one colony from the northeast coast of Taiwan  
138 (25°02'N, 121°98'E). Coral nubbins (n=12) were acclimated in a 30-liter aquarium  
139 filled with filtered nature seawater for two weeks at 25°C. The temperature of the  
140 water baths was maintained by Hailea 150A aquarium chillers. Light intensity was  
141 about 150- $\mu$  mol photons m<sup>-2</sup> s<sup>-1</sup> under 12/12 h light and dark cycles.

142 The treatment tank was raised by 1°C per day for 9 days from 25°C to 33°C. The

143 control tank was maintained at 25°C throughout the experiment (Fig. 1B). HOBO  
144 temperature loggers were placed in the tanks to monitor the water temperature. Coral  
145 mucus and tissue were collected from three randomly chosen coral nubbins on Days 1  
146 and 9 from the two tanks. The detailed method for coral mucus and tissue collection is  
147 described below.

148 First, the nubbins were rinsed with artificial seawater (ASW). Then, the mucus  
149 was “milked” from each nubbin and collected in a 5 mL tube. Later, we sprayed the  
150 tissues (with some mucus) from the same nubbin with ASW. In the laminar hood, we  
151 transferred mucus (1 mL) and tissue (1 mL) into two separate dialysis tubings. These  
152 dialysis tubings were placed into two 50 mL Falcon tubes containing 15 mL bacteria  
153 cultures, separately. A total of 12 samples (mucus: n=6, tissue: n=6) from the  
154 treatment and control tanks were incubated at 25°C at 200 rpm on Day 1 (Fig. 1B).  
155 Another dialysis bag, which contained ASW (1 mL), was put into another 15 mL  
156 bacteria culture with three replicates, which acted as controls (25°C and 200 rpm).  
157 After six hours of incubation, all the bacteria culture from each tube were collected  
158 into several 2 mL Eppendorf tubes and centrifuged at 9000 x g for 10 mins. The  
159 supernatant was discarded, and the pellet was stored at -80°C until total protein  
160 extraction. Bacteria growth (1 mL) was monitored by measuring the OD values at the  
161 same time.

162 On the ninth day, coral mucus and tissue were collected using the same approach  
163 described above—except that the sample tubes, which had the coral extract (mucus or  
164 tissue) from the treatment tank, were now at 33°C. Three of the ASW sample tubes  
165 were incubated at 33°C as well. For the control tank, those sample tubes (containing  
166 mucus, tissue or ASW) were incubated at 25°C. Thus, there were a total of 18  
167 samples on the ninth day. After six hours, all of the 15 mL bacteria cultures were  
168 collected from the Falcon tubes and the OD value was measured.

### 169 **Protein preparation and LC-Mass Spectrometry Method**

170 Total protein was extracted using ExtractPRO Protein Extraction Reagent  
171 (VisualProtein, Energenesis Biomedical, Taiwan) following the manufacturer's  
172 instructions. The protein pellet was firstly suspended in 8 M Urea in 50 mM Tris-HCl  
173 (pH 8.0) for the extraction.

174 Protease digestion and labeling before LC-MS analysis were performed as  
175 described in Lan et al. [24]. Protein concentrations were measured using a Pierce 660

176 nm protein Assay kit (Thermo Fisher Scientific, Rockford, USA). Proteins (100 µg)  
177 from each sample were reduced in 10 mM dithiothreitol for 1 h at 37°C and alkylated  
178 in 50 mM iodoacetamide at room temperature for 30 min in the dark. The protein  
179 solution was then diluted with 4 M urea with 50 mM Tris-Cl, pH 8.5 and digested  
180 with 250 units/ml of Benzonase (Sigma-Aldrich, St. Louis, USA) at room temperature  
181 for 2 h, followed by lysyl endopeptidase (Wako, Japan) digestion (1:200 (w/w)) at  
182 room temperature for 4 h. The protein solution was further diluted down to less than 2  
183 M urea with 50 mM Tris-Cl (pH 8) and incubated with 2 µg of modified trypsin (w/w,  
184 1:50) (Promega, Madison, WI, USA) at 37°C overnight. This protease digested  
185 solution was acidified with 10% trifluoroacetic acid, desalted using an Oasis HLB  
186 cartridge (Waters) and dried with a SpeedVac (Thermo Fisher Scientific, Rockford,  
187 USA).

188 After protein digestion, the peptide mixture was labeled with TMT 10-plex and  
189 11-plex isobaric tandem mass tags (catalog no. 90110 and A34808, Thermo Fisher  
190 Scientific, Rockford, USA) following the manufacturer's instruction. The labeled  
191 peptide samples were then pooled and lyophilized in a vacuum concentrator. The final  
192 dried pellet was re-dissolved in 10 of 3% ACN / 0.1% formic acid and its protein  
193 profile analyzed by LC-MS/MS (Orbitrap Fusion™ Tribrid™ Mass Spectrometer).

#### 194 **Data analysis**

195 Peptide and protein identification were performed using the Proteome Discoverer  
196 software (v2.2, Thermo Fisher Scientific) with SEQUEST search engine [25, 26].  
197 Protein identification used 10 ppm and a fragment ion mass tolerance of 0.02 Da. The  
198 q-value threshold of 0.01 was used to filter the peptides. In addition, the minimal  
199 required peptide length was set to two peptides per protein. Only the proteins that  
200 were exhibited in all three replicate samples were kept.

201 The identified proteins were subjected to Gene Ontology (GO) annotation using  
202 the analytical system of Generic Gene Ontology Term Finder  
203 ([http://go.princeton.edu/cgi-bin/GO Term Finder](http://go.princeton.edu/cgi-bin/GO_Term_Finder)). The biological pathways of the  
204 proteins were acquired from the KEGG Pathway database  
205 (<http://www.genome.ad.jp/kegg/>) coupled with UniProtKB annotation (UniProtKB  
206 database, <http://www.uniprot.org/>). Protein profiles were analyzed for statistical  
207 significance analysis with the Proteome Discoverer software. Proteins with a log<sub>2</sub> fold  
208 change (log<sub>2</sub>FC) <1.5 (or >1.5) and *p* < 0.05 were considered significantly different in



209 the protein quantification (one-way ANOVA). Furthermore, significantly expressed  
210 proteins were clustered into different function categories using the Cluster of  
211 Orthologous Groups of proteins (COG) database  
212 (<https://www.ncbi.nlm.nih.gov/COG>). Hierarchical clustering analysis and nMDS  
213 analysis were used to visualize the pairwise dissimilarity in protein composition  
214 between different samples after transformation ( $\text{Log}(x+1)$ ) by Primer 6 (PRIMER-E,  
215 Luton, Lvybridge, United Kingdom) [27].

216 In the coral lysate experiment, comparisons among or within the treatment and  
217 control experiments revealed the proteins that were differentially produced across the  
218 bacteria that were affected by four different factors (coral lysate, tank, temperature  
219 and time) (Fig. 1C). (1) The differentially produced proteins of bacteria between the  
220 artificial seawater and mucus (or tissue) represented the effect of coral lysate in 25°C  
221 or 33°C treatment experiments (25M/25S, 25T/25S, 33M/33S, and 33T/33S). (2)  
222 Comparisons between control and treatment experiments on the first day were  
223 represented as tank effects (25M/C1M and 25T/C1T). (3) The differentially produced  
224 proteins of bacteria between the control and treatment experiments on the last day  
225 represented as temperature effects (33M/C2M, 33T/C2T, and 33S/C2S). (4) Time also  
226 appeared to have an effect, with the first and last day of the control experiments  
227 yielding different proteins (C2M/C1M, C2T/C1T, and C2S/25S).

228

## 229 **Results**

### 230 **Growth curve of *E. montiporae* in heat stress experiments**

231 To monitor the growth conditions of *E. montiporae* under thermal stress and  
232 determine the sampling time for the second experiment (the coral lysate experiment),  
233 we estimated the OD values of *E. montiporae* during different growth phases in the  
234 three temperatures treatments. The maximum OD value of *E. montiporae* was 1.28 at  
235 25°C and 1.2 at 31°C after 36 hours. However, the growth curve at 33°C was lower  
236 than those of the other two temperatures, especially after 24 hours of incubation (Fig.  
237 2A); therefore, *E. montiporae* grew slower at 33°C than at the other two temperatures.

### 238 **An overview of protein profiles in heat stress experiments**

239 A total of 1,477,327 unique spectra and 33,841 unique peptides were detected by  
240 the LC-MS/MS, and 2,017 unique proteins were identified across the 24 samples.  
241 Approximately 41% of the 4,910 predicted open reading frames in the genome of *E.*  
242 *montiporae* CL-33<sup>T</sup> were identified from all 24 samples. Most proteins are  
243 functionally related to the categories in the cellular metabolic process, nitrogen  
244 compound metabolic process, and primary metabolic process according to GO (Suppl.  
245 Fig. S1). Noteworthily, 59 proteins were annotated in GO as responding to stress—  
246 e.g., chaperone proteins and catalase (Suppl. Fig. S1).

247 Results of hierarchical clustering and nMDS analyses showed that the protein  
248 profiles of the *E. montiporae* grown for 48 hours were clearly distinct from the  
249 profiles of those grown for 16 and 24 hours (Fig. 2B and C). Comparing within the  
250 same incubation time, the protein profiles from 25°C were different from those at  
251 31°C and 33°C (Fig. 2B). Bacteria grown for 16 hours at 25°C were especially  
252 separate from other samples.

### 253 **Significantly expressed proteins in the heat stress experiments**

254 The number of differentially expressed proteins (DEPs) decreased with  
255 increasing incubation time (Fig. 2D, Data set 1). At 16 hours, the number of DEPs in  
256 the culture at 33°C (79 proteins) was more than the culture at 31°C (68 proteins).  
257 After 24 hours, both *E. montiporae* cultured at 31°C and 33°C showed about 43 to 51  
258 DEPs. In the time course, up-expression proteins were detected less and less in *E.*  
259 *montiporae* cultured at 31°C and 33°C (Fig. 2F). Furthermore, the up-expression  
260 proteins in *E. montiporae* cultured at 33°C were less than that at 31°C at every time  
261 point. In contrast, *E. montiporae* cultured at 33°C had more down-expression proteins

262 than *E. montiporae* cultured at 31°C. Sixty-six of the total 154 DEPs were annotated  
263 by COGs (Suppl. Table. S1). Except for proteins with unknown function, most of the  
264 COG annotated-proteins were in the metabolism category (43.52%).

265 A heatmap (*z*-score transformed) was made to detect expression patterns of the  
266 DEPs in the metabolism category (Fig. 2E). Cluster I shows down-expression proteins  
267 after 16 hours at 31°C and 33°C, respectively. Those down-expression proteins are  
268 mainly involved in the oxidation-reduction process and pyruvate metabolism. Cluster  
269 II shows the up-expression proteins after 16 hours at 31°C and 33°C. These up-  
270 expression proteins were involved in the oxidation-reduction process, pyruvate  
271 metabolism, glycerolipid metabolism, carbohydrate metabolism, transport, and others.  
272 Furthermore, Cluster III shows down-expression proteins after 48 hours, especially  
273 the culture at 33°C. These proteins are mainly involved in steroid degradation and  
274 ABC transport.

275 We categorized the proteins related to heat shock-related responses into two  
276 groups: (1) heat shock protein and co-chaperone proteins, and (2) antioxidant defense  
277 proteins (Suppl. Table. S2). The first group of proteins were up-expressed after 16  
278 hours at 31°C and 33°C. In particular, the small heat shock protein IbpA ( $\log_2FC$   
279 2.81), chaperone protein ClpB ( $\log_2FC$  1.76), lon protease ( $\log_2FC$  1.72), and  
280 periplasmic serine endoprotease DegP ( $\log_2FC$  1.93) were significantly up-expressed  
281 after 16 hours at 33°C when tricorn protease was significantly down-expressed after  
282 48 hours. In the category of antioxidant defense proteins, catalase proteins were  
283 down-expressed after 24 and 48 hours in the *E. montiporae* culture at 33°C ( $\log_2FC$ : -  
284 2.08 and -2.1).

### 285 **Physiological condition of coral and *E. montiporae* in the coral lysate experiment**

286 The average PAM values decreased from 0.7 to 0.6 following an increase in the  
287 water temperature in the experimental tank (Suppl. Fig. S2) (coral color card E3).  
288 However, the average PAM value in the control tank was consistent at 0.67  
289 throughout the experiment. In addition, the color of the coral nubbins remained dark  
290 brown in the control tank (Suppl. Fig. S2) (coral color card E5).

291 The average OD values of bacterial cultures changed from 0.5 to 0.9 during  
292 incubation (6 hours in total), indicating that the bacterial growth stayed in the  
293 exponential phase throughout the experimental time (Suppl. Fig. S3).

### 294 **An overview of the protein profiles in the coral lysate experiment**

295 A total of 2,950,378 spectra and 33,582 unique peptides were detected. Among  
296 them, 1,901 unique proteins were identified across all samples, accounting for 38.7%  
297 of the 4,910 predicted open reading frames in the *E. montiporae* CL-33<sup>T</sup> genome.  
298 Most proteins were involved in organic substance metabolic processes, cellular  
299 metabolic processes, primary metabolic processes and nitrogen compound metabolic  
300 processes (Suppl. Fig. S5).

301 In the nMDS analysis, one replicate (25M\_1) from the mucus treatment at 25°C  
302 was not clustered with the other two; it was deemed an outlier (Suppl. Fig. S4A) and  
303 removed from subsequent analyses (Suppl. Fig. S4B). Clustering samples were  
304 clearly separated by temperature (33°C and 25°C) (Fig. 3A). Furthermore, the  
305 samples from the first day in the control tank (C1M and C1T) and treatment tank  
306 (25M, 25T and 25S) were clustered together (Fig. 3A).

### 307 **DEPs in the coral lysate experiment**

308 Comparing the effects of coral lysate and temperature, a high number of DEPs  
309 (approximately 50) were detected based on changes in temperature, and only a few  
310 (seven) were detected to have been caused by the coral lysate (Fig. 3C, Data set 2).  
311 Furthermore, most of the DEPs in temperature effect were down-expressed (Fig. 3D).  
312 Five proteins, involved in two categories of bacterial heat stress response, were highly  
313 up- or down-expressed during the 6 hours of incubation (Suppl. Table S3): the small  
314 heat shock protein IbpA, Ion protease, catalase, aldehyde dehydrogenase and 4-  
315 hydroxyphenylacetate 3-monooxygenase oxygenase component.

316 COG analysis was performed for all of the DEPs in the metabolism process  
317 category (Suppl. Table S4). In those proteins, the z-score heatmap displayed 18 down-  
318 expressed proteins related to steroid degradation in mucus and tissue treatments (Fig.  
319 3E). Moreover, there were also eight down-expressed proteins involved in pyruvate  
320 metabolism (Fig. 3E).

321 To gain more insights into the potentially important cellular mechanisms of  
322 bacteria-coral host interactions, proteins that underwent significant changes but had a  
323  $\log_2FC < 1.5$  were also discussed. Hence, if we consider all of the differential  
324 expression proteins ( $p < 0.05$ , regardless of their  $\log_2FC$ ), 10 to 70 proteins were  
325 influenced by the coral lysate effect (Fig. 4A, Suppl. Table S5). Furthermore, many  
326 differential expression proteins were down-expressed in the tissue treatment at 25°C  
327 (25T/25S), but up-expressed in the tissue treatment at 33°C (33T/33S) (Fig. 4B). In

328 addition, most of the  $\log_2FC$  of differential expression proteins were  $<1$  in the tissue  
329 treatments at 25°C and 33°C (Fig. 4C). Noteworthy, 14 differential expression  
330 proteins were detected in the mucus treatment at 25°C (25M/25S) and had a  $\log_2FC >$   
331 1; these 14 proteins were involved in the signal recognition particle pathway and  
332 toxin-antitoxin system (Table 1).

333 The tank and time effects were very low because most proteins maintained a  
334 similar protein abundance ( $\log_2FC < 1.5$ ; Suppl. Fig. S6 and S7).

## 335 **Discussion**

336 *Endozoicomonas* is a core bacterial group in corals that plays a role in coral  
337 health, and often decreases rapidly in corals under heat stress [5, 6, 10, 28]. However,  
338 how these bacteria respond to changes in temperature and coral hosts during heat  
339 stress were unknown until now. This study is the first to provide insights into the  
340 physiological changes of *E. montiporae* to heat stress and host factors using a  
341 proteomic approach. We designed two experiments to clarify how much temperature  
342 and the coral host influence the bacterium, and how bacterial metabolism is affected  
343 by both factors. Our study shows that temperature is the main factor affecting protein  
344 abundance in the bacterium, though the coral host also has some influence. More  
345 details are given in the following paragraphs.

346

### 347 **Impact of high temperature on the protein profiles of *E. montiporae***

348 Temperature was the main factor in this study affecting changes in the protein  
349 profiles of *E. montiporae*. Previous studies have shown that *Endozoicomonas* are  
350 highly sensitive to temperature changes in various corals [5, 9, 10, 17, 29]. Most  
351 recent studies also show the same phenomenon—e.g., at 32°C, *Endozoicomonas*  
352 populations' relative abundances rapidly halved in the coral *Pocillopora damicornis*  
353 within 48 h [30]. In the coral *Stylophora pistillata*, the resident *Endozoicomonas*  
354 population quickly decreased at 32°C and 34.5°C over 6 hours [28].

355 However, what exactly caused these reductions in *Endozoicomonas* is still  
356 mostly unknown. There are some possible reasons for the phenomenon. One is that  
357 heat stress made it difficult for the bacteria to live and grow in their host corals, and  
358 the bacteria consequently left for other habitats. Or other bacteria outcompeted the  
359 *Endozoicomonas*. Our molecular study clearly shows that a stressful physiological  
360 status is one of the major factors that causes *Endozoicomonas* populations to decline  
361 in corals. At 33°C, those crucial metabolisms such as the proteins for central  
362 metabolisms were mostly down-expressed in this study. In other words,  
363 *Endozoicomonas* physiology—including growth—was clearly influenced by heat  
364 stress. Protein expression changed starkly for a number of proteins, such as heat-  
365 shock proteins, stress-associated reactive oxygen species, and other important  
366 metabolism-related proteins. We elaborate on each of these below.

367 The heat shock-related response is one of the fundamental responses that most  
368 bacteria have to heat stress [31]. How heat shock proteins (HSPs) help bacteria adapt  
369 and survive in thermal stress environments had been widely explored by previous  
370 studies [32-36]. In this study, a number of HSPs and co-chaperones were significantly  
371 increased in *E. montiporae* in the two heat stress experiments; for example, small heat  
372 shock protein IbpA, chaperone protein ClpB, lon protease, and periplasmic serine  
373 endoprotease DegP were all up-expressed after 16 hours at 33°C (log<sub>2</sub>FC values were  
374 about 2). Previous studies suggested that those proteins contribute to the resolution of  
375 protein aggregates to confer superior heat tolerance [37-39]. In particular, we found  
376 that IbpA and lon protease were quickly expressed during the 6 h of incubation at  
377 33°C in the coral lysate experiment (meaning log<sub>2</sub>FC of IbpA was 2.36 and lon  
378 protease was 1.16). The major consequences of increasing temperature for cells are  
379 protein unfolding and aggregation, with concomitant loss of function [38]. Those  
380 unfolding or aggregated proteins could be degraded and cleaned by both IbpA and  
381 Lon proteases under heat stress [40]. Thus, *E. montiporae* responded quickly to the  
382 expression of HSPs to prevent the irreversible aggregation or misfolding of proteins  
383 in the early stages of the heat stress treatment, especially at 33°C.

384 Reactive oxygen species (ROS) are crucial to the coral holobiont, and they are  
385 tightly associated with coral physiology under heat stress and bleaching conditions  
386 [41, 42]. Removing ROS is critical for corals to maintain their homeostasis during  
387 stress. In this study, we also detected a rapid change in the proteins that are  
388 responsible for ROS-related metabolisms. For example, catalases are mainly  
389 responsible for removing ROS in many bacterial cells. Similarly, *E. montiporae*  
390 expressed more catalases (Log<sub>2</sub>FC: 1.91) and other antioxidant defense proteins (i.e.  
391 hydroperoxy fatty acid reductase) at 31°C that would facilitate the bacterium to  
392 remove extra ROS from cells and prevent further damages by ROS. However, the  
393 expression of those proteins was decreased at 33°C, suggesting that the bacterium's  
394 physiology was not functioning properly. The growth curve of the bacterial culture at  
395 33°C also plateaued earlier than the other two temperature treatments, also indicating  
396 that the bacteria grew incompetently at 33°C. Additionally, we also noticed that  
397 energy-related metabolism under heat stress in the coral lysate experiment was  
398 significantly decreased—such as the key proteins, phosphoenolpyruvate synthase and

399 phosphoenolpyruvate carboxykinase—also suggesting that the bacteria had poor  
400 cellular physiology at 33°C.

401 The temperature effect also greatly reduced ecotin levels in *E. montiporae*  
402 (meaning of log<sub>2</sub>FC was -2.51). Ecotin, which is usually located in periplasmic space  
403 of many bacteria, is both a serine protease inhibitor and functionally related to  
404 bacterial defenses against bacteriophages and other bacteria [43-46]. A recent study  
405 found that ecotin plays a role in the defense of *Escherichia coli* against attacks from  
406 *Vibrio cholera* [47]. The decrease in ecotin levels in *E. montiporae* at high  
407 temperature might weaken the bacterium's defenses against other bacteria.  
408 Intriguingly, Lee et al. [9] found that the *E. montiporae* population decreased at high  
409 temperatures while *Vibrio* spp. increased rapidly under the same conditions. Perhaps  
410 the phenomenon of these opposing changes in *E. montiporae* and *Vibrio* spp. was  
411 partially the result of *E. montiporae* becoming more defenseless at the high  
412 temperature, allowing *Vibrio* spp. to colonize the coral tissues. Myint et al. [47] also  
413 showed that an *E. coli* ecotin mutant became more susceptible to *V. cholera* attack  
414 than did the wild type strain. However, the relationship between ecotin and the  
415 defense mechanism in *E. montiporae* requires mutation experiments to prove.

416

#### 417 **Effects of heat stress-induced coral lysate on *E. montiporae***

418 In addition to temperature, we found that host factors changed a number of  
419 proteins in the co-incubation experiment with coral lysates, suggesting that bacterial  
420 physiological responses to heat stress are constituted by both temperature and host  
421 factors. Under stressful conditions, coral host factors also affected or influenced the  
422 bacterium. Some intriguing proteins are discussed as follows.

423 First, N,N'-diacetylchitobiose-specific EIIA component (ChbA) of *E. montiporae*  
424 was up-expressed with a high value of log<sub>2</sub>FC (i.e., 1.29) in the thermal stressed-coral  
425 mucus samples. ChbA protein participates in transporting cellobiose and belongs to  
426 the phosphoenolpyruvate-dependent sugar phosphotransferase system (PTS system), a  
427 major carbohydrate active transport system in bacteria [48]. Cellobiose is a sugar  
428 component of cellulose and the major composition of algal cells [49, 50]. A recent  
429 report shows that *Symbiodiniaceae* increased in coral mucus after incubating at 31°C  
430 [51], suggesting that the cellobiose concentration increases in the mucus at higher  
431 temperatures. In our study, the increase in ChbA levels in *E. montiporae* could be



432 induced to transport increasing amounts of cellobiose. Moreover, high ChbA  
433 expression might also help in the removal of unwanted algal components in coral host  
434 by the PTS system, as suggested by Neave et al. [22], who discovered many genes of  
435 the PTS system encoded in *Endozoicomonas* genomes.

436 Second, the proteins involved in steroid degradation in *E. montiporae* had more  
437 down-expression in the mucus and tissue treatments than in the seawater treatment  
438 under heat stress (Fig 3E). For example, the log<sub>2</sub>FCs of 3-oxosteroid 1-dehydrogenase  
439 were -2.01 and -2.3 in mucus and tissue treatments, but -1.69 in the seawater  
440 treatment. This implies that the thermal-stressed coral lysate had additional effects on  
441 the expression of proteins during the heat stress. Why did the temperature effect cause  
442 the down-expression of proteins that were involved in steroid degradation in *E.*  
443 *montiporae* under heat stress? The steroid uptake mechanisms in bacteria have  
444 remained unclear because of high physiological and structural differences among  
445 bacterial groups [52]. A previous study, however, demonstrated that down-expression  
446 of steroid metabolism processes in the coral *Acropora* spp. and *Symbiodiniaceae*  
447 during the thermal stress [53]. Hence, we speculate that the phenomenon that the  
448 proteins involved in steroid degradation in *E. montiporae* decreased could be caused  
449 by the lower concentration of steroids in the coral lysate after the heat stress  
450 treatment. This hypothesis, however, requires more experimentation to prove.

451 It is worth addressing that fewer proteins underwent significant changes in the  
452 coral lysate effect than the temperature effect in the coral lysate experiment. This  
453 could be partially due to a limitation in the experiment—that the dialysis tubing with  
454 a pore size of 14 kDa used to load coral lysate only allowed small molecules to pass  
455 into the bacterial culture. Molecules such as glucose, vitamin B12, inorganic salt, and  
456 cytochrome C can pass through the tubing, but larger molecules—such as liposome  
457 and starch—could not. Thus, the effect of host factors on *E. montiporae* are likely to  
458 be underestimated.

459

### 460 **Three protein groups in *E. montiporae* were more active only with unheated** 461 **coral mucus**

462 Coral mucus composition is dynamic of changes in host physiology and  
463 environmental factors. For example, Lee et al [9] demonstrated that there was a shift  
464 in the proportion of different sugar components in coral mucus after heat stress.

465 Interestingly, we found that *E. montiporae* showed significant changes in protein  
466 expressions, and that log<sub>2</sub>FC values were higher than 1 when the bacteria were co-  
467 incubated with mucus at 25°C compared with the seawater samples (Table 1). Most of  
468 the proteins were involved in three types of protein groups: signal recognition particle  
469 pathway, type II toxin-antitoxin system and V-type ATPase. These significantly  
470 changed proteins were presented only with unheated coral mucus rather than heat  
471 stress induced-coral mucus. This indicates that specific factors in coral mucus must  
472 change during heat stress and affect the expression of those proteins in *E. montiporae*.  
473 In other words, those highly expressed protein groups are likely to be functionally  
474 related to coral mucus under regular conditions.

475 The first group comprised six significantly changed proteins involved in the  
476 signal recognition particle pathway (SRP). SRP is essential for delivering the nascent  
477 protein to properly localize the inner membrane and mediate secretory proteins [54,  
478 55]. SRP depletion may cause the accumulation of mis-localized proteins in bacteria  
479 [56]. Many reports showed various evidence that the SPR pathway plays important  
480 roles in membrane integrity, cell physiology, and viability [57-60]. In this study, high  
481 expression of the SRP is specifically associated with coral mucus, suggesting that the  
482 SRP might be functionally crucial for *E. montiporae* living in or passing coral mucus  
483 during colonization.

484 The second group is two highly expressed proteins, HigB and HigA, also called  
485 Type II toxin-antitoxin (TA) system, which is present in many bacteria [61, 62]. They  
486 are a pair of proteins composed of a stable toxin and its cognate antitoxin protein.  
487 Under normal growth conditions, they form a tight and nontoxic complex. When the  
488 antitoxin is degraded by proteases under environmental stress, cell fundamental  
489 functions such as growth, gene regulation and biofilm formation are impaired [63,  
490 64]. Hence, the high expression of HigB and HigA also indicates that *E. montiporae*  
491 was in a non-stressful condition. Moreover, the TA system is also functionally related  
492 to defense in bacteria. For example, Sberro et al. [65] demonstrated that the TA  
493 system in *E. coli* provides resistance against the T7 phage. Our proteomic results  
494 suggest that the up-expression of the TA system would be helpful to *E. montiporae* in  
495 defense.

496 The third group is V-type ATPase. The log<sub>2</sub>FC of V-type ATPase subunit E in *E.*  
497 *montiporae* increased to 1.63. V-type ATPase is a membrane-embedded protein

498 complex [66]. V-type ATPase was found not only in eukaryotes but also archaea and  
499 bacteria, including *Thermus thermophilus*, *Enterococcus hirae*, *Lactobacillus*  
500 *plantarum*, and *Clostridium feravidus* [67-71]. V-type ATPase in bacteria have  
501 multiple functions, including proton pump, ion pump and ATP synthesis [72-75].  
502 Moreover, V-type ATPase also plays a role in maintaining physiological homeostasis  
503 for bacteria [76-78]. Although the function of V-type ATPase is still unclear in *E.*  
504 *montiporae*, highly expressed V-type ATPase in *E. montiporae* serves as potential  
505 evidence of a specific response that is functionally related to coral mucus in coral-*E.*  
506 *montiporae* interactions.

507

### 508 **Conclusion**

509 To establish a working model for the in-depth investigation of bacteria-coral  
510 interactions, this study used the cultivable, dominant coral-associated bacterium *E.*  
511 *montiporae* as a model organism to dissect changes in proteomic profiles of the  
512 bacteria, responding to heat stress and heat stressed-coral lysate. We successfully  
513 detected a number of pivotal proteins related to the heat-stress physiology of *E.*  
514 *montiporae* that provides new research directions in the molecular microbiology and  
515 microbial ecology of *E. montiporae* in the coral holobiont. This is one of few primary  
516 works exploring the molecular mechanisms underlying physiological changes in coral  
517 symbiotic bacteria, and we anticipate that this study will inspire more molecular  
518 studies on coral microbes that will better elucidate the detailed coral-bacteria  
519 interactions.

520

## 521 **Acknowledgement**

522 This work was supported by the Ministry of Science and Technology (MOST) in  
523 Taiwan (grant No. MOST107-2611-M-001-002, MOST108-2611-M-001-004, and  
524 MOST109-2611-M-001-002) and three Postdoctoral Research Fellows projects (grant  
525 No. MOST107-2811-M-001-043, MOST108-2811-M-001-603, and MOST109-2811-  
526 M-001-586). Ya-fan Chan is also supported by the Ministry of Science and  
527 Technology, Taiwan (MOST 110-2611-M-031-001) and Research Grants for New  
528 Teachers of College of Science, Soochow University, Taiwan. We thank Miss Yin-  
529 Chu Cheng and Mr. Tzu-Chieh Lin (institute of Marine Environment and Ecology,  
530 National Taiwan Ocean University, Taiwan) for their help in collecting the corals.

531

## 532 **Conflict of Interest**

533 The authors declare that they have no conflict of interest.

534

## 535 **References:**

- 536 1. Hughes TP, Kerry JT, Álvarez-Noriega M, Álvarez-Romero JG, Anderson KD,  
537 Baird AH *et al* (2017). Global warming and recurrent mass bleaching of corals.  
538 *Nature* **543**: 373-377.
- 539
- 540 2. Bourne DG, Morrow KM, Webster NS (2016). Insights into the coral microbiome:  
541 underpinning the health and resilience of reef ecosystems. *Annual review of*  
542 *microbiology* **70**: 317-340.
- 543
- 544 3. Hughes TP, Kerry JT, Baird AH, Connolly SR, Dietzel A, Eakin CM *et al* (2018).  
545 Global warming transforms coral reef assemblages. *Nature* **556**: 492-496.
- 546
- 547 4. Kemp DW, Hernandez-Pech X, Iglesias-Prieto R, Fitt WK, Schmidt GW (2014).  
548 Community dynamics and physiology of Symbiodinium spp. before, during, and after  
549 a coral bleaching event. *Limnol Oceanogr* **59**: 788-797.
- 550
- 551 5. Bourne D, Iida Y, Uthicke S, Smith-Keune C (2008). Changes in coral-associated  
552 microbial communities during a bleaching event. *Isme J* **2**: 350-363.

553

- 554 6. McDevitt-Irwin JM, Baum JK, Garren M, Vega Thurber RL (2017). Responses of  
555 coral-associated bacterial communities to local and global stressors. *Frontiers in*  
556 *Marine Science* **4**: 262.  
557
- 558 7. Mouchka ME, Hewson I, Harvell CD (2010). Coral-associated bacterial  
559 assemblages: current knowledge and the potential for climate-driven impacts.  
560 *Integrative and comparative biology* **50**: 662-674.  
561
- 562 8. Ziegler M, Seneca FO, Yum LK, Palumbi SR, Voolstra CR (2017). Bacterial  
563 community dynamics are linked to patterns of coral heat tolerance. *Nat Commun* **8**: 1-  
564 8.  
565
- 566 9. Lee ST, Davy SK, Tang S-L, Fan T-Y, Kench PS (2015). Successive shifts in the  
567 microbial community of the surface mucus layer and tissues of the coral *Acropora*  
568 *muricata* under thermal stress. *Fems Microbiol Ecol* **91**: fiv142.  
569
- 570 10. Shiu J-H, Keshavmurthy S, Chiang P-W, Chen H-J, Lou S-P, Tseng C-H *et al*  
571 (2017). Dynamics of coral-associated bacterial communities acclimated to  
572 temperature stress based on recent thermal history. *Scientific Reports* **7**: 14933.  
573
- 574 11. van Oppen MJ, Blackall LL (2019). Coral microbiome dynamics, functions and  
575 design in a changing world. *Nature Reviews Microbiology* **17**: 557-567.  
576
- 577 12. Gao C, Garren M, Penn K, Fernandez VI, Seymour JR, Thompson JR *et al*  
578 (2021). Coral mucus rapidly induces chemokinesis and genome-wide transcriptional  
579 shifts toward early pathogenesis in a bacterial coral pathogen. *The ISME Journal*: 1-  
580 15.  
581
- 582 13. Bayer T, Arif C, Ferrier-Pages C, Zoccola D, Aranda M, Voolstra CR (2013).  
583 Bacteria of the genus *Endozoicomonas* dominate the microbiome of the  
584 Mediterranean gorgonian coral *Eunicella cavolini*. *Mar Ecol Prog Ser* **479**: 75-84.  
585

- 586 14. Mendoza M, Guiza L, Martinez X, Caraballo X, Rojas J, Aranguren LF (2013). A  
587 novel agent (*Endozoicomonas elysicola* responsible for epitheliocystis in cobia  
588 *Rachycentrum canadum* larvae. *Dis Aquat Organ* **106**: 31-37.  
589
- 590 15. Meyer JL, Paul VJ, Teplitski M (2014). Community shifts in the surface  
591 microbiomes of the coral *Porites astreoides* with unusual lesions. *Plos One* **9**:  
592 e100316.  
593
- 594 16. Tandon K, Lu C-Y, Chiang P-W, Wada N, Yang S-H, Chan Y-F *et al* (2020).  
595 Comparative genomics: Dominant coral-bacterium *Endozoicomonas acroporae*  
596 metabolizes dimethylsulfoniopropionate (DMSP). *The ISME Journal* **14**: 1290-1303.  
597
- 598 17. Neave MJ, Apprill A, Ferrier-Pagès C, Voolstra CR (2016). Diversity and  
599 function of prevalent symbiotic marine bacteria in the genus *Endozoicomonas*. *Appl*  
600 *Microbiol Biot* **100**: 8315-8324.  
601
- 602 18. Chen W-M, Lin K-R, Sheu S-Y (2019). *Endozoicomonas coralli* sp. nov., isolated  
603 from the coral *Acropora* sp. *Arch Microbiol* **201**: 531-538.  
604
- 605 19. Sheu S-Y, Lin K-R, Hsu M-y, Sheu D-S, Tang S-L, Chen W-M (2017).  
606 *Endozoicomonas acroporae* sp. nov., isolated from *Acropora* coral. *Int J Syst Evol*  
607 *Micr* **67**: 3791-3797.  
608
- 609 20. Yang C-S, Chen M-H, Arun A, Chen CA, Wang J-T, Chen W-M (2010).  
610 *Endozoicomonas montiporae* sp. nov., isolated from the encrusting pore coral  
611 *Montipora aequituberculata*. *Int J Syst Evol Micr* **60**: 1158-1162.  
612
- 613 21. Ding J-Y, Shiu J-H, Chen W-M, Chiang Y-R, Tang S-L (2016). Genomic insight  
614 into the host–endosymbiont relationship of *Endozoicomonas montiporae* CL-33T  
615 with its coral host. *Front Microbiol* **7**: 251.  
616
- 617 22. Neave MJ, Michell CT, Apprill A, Voolstra CR (2017). *Endozoicomonas*  
618 genomes reveal functional adaptation and plasticity in bacterial strains symbiotically  
619 associated with diverse marine hosts. *Scientific Reports* **7**.

620

621 23. Lee ST, Davy SK, Tang S-L, Kench PS (2016). Mucus Sugar Content Shapes the  
622 Bacterial Community Structure in Thermally Stressed *Acropora muricata*. *Front*  
623 *Microbiol* **7**.

624

625 24. Lan P, Li W, Wen T-N, Shiau J-Y, Wu Y-C, Lin W *et al* (2011). iTRAQ protein  
626 profile analysis of Arabidopsis roots reveals new aspects critical for iron homeostasis.  
627 *Plant Physiol* **155**: 821-834.

628

629 25. MacCoss MJ, Wu CC, Yates JR (2002). Probability-based validation of protein  
630 identifications using a modified SEQUEST algorithm. *Analytical chemistry* **74**: 5593-  
631 5599.

632

633 26. Muthusamy S, Lundin D, Mamede Branca RM, Baltar F, González JM, Lehtiö J  
634 *et al* (2017). Comparative proteomics reveals signature metabolisms of exponentially  
635 growing and stationary phase marine bacteria. *Environ Microbiol* **19**: 2301-2319.

636

637 27. Clarke K, Gorley R (2005). PRIMER: Getting started with v6. *PRIMER-E Ltd*:  
638 *Plymouth, UK*.

639

640 28. Savary R, Barshis DJ, Voolstra CR, Cárdenas A, Evensen NR, Banc-Prandi G *et*  
641 *al* (2021). Fast and pervasive transcriptomic resilience and acclimation of extremely  
642 heat-tolerant coral holobionts from the northern Red Sea. *Proceedings of the National*  
643 *Academy of Sciences* **118**.

644

645 29. Maher RL, Schmeltzer ER, Meiling S, McMinds R, Ezzat L, Shantz AA *et al*  
646 (2020). Coral microbiomes demonstrate flexibility and resilience through a reduction  
647 in community diversity following a thermal stress event. *Frontiers in Ecology and*  
648 *Evolution* **8**: 356.

649

650 30. Li J, Long L, Zou Y, Zhang S (2021). Microbial community and transcriptional  
651 responses to increased temperatures in coral *Pocillopora damicornis* holobiont.  
652 *Environ Microbiol* **23**: 826-843.

653

- 654 31. Guo MS, Gross CA (2014). Stress-induced remodeling of the bacterial proteome.  
655 *Curr Biol* **24**: R424-R434.  
656
- 657 32. Lee K-J, Jung Y-C, Park S-J, Lee K-H (2018). Role of heat shock proteases in  
658 quorum-sensing-mediated regulation of biofilm formation by *Vibrio* species. *Mbio* **9**:  
659 e02086-02017.  
660
- 661 33. Lüders S, Fallet C, Franco-Lara E (2009). Proteome analysis of the *Escherichia*  
662 *coli* heat shock response under steady-state conditions. *Proteome Science* **7**: 1-15.  
663
- 664 34. Mosier AC, Li Z, Thomas BC, Hettich RL, Pan C, Banfield JF (2015). Elevated  
665 temperature alters proteomic responses of individual organisms within a biofilm  
666 community. *The ISME journal* **9**: 180-194.  
667
- 668 35. Sowell SM, Norbeck AD, Lipton MS, Nicora CD, Callister SJ, Smith RD *et al*  
669 (2008). Proteomic analysis of stationary phase in the marine bacterium “*Candidatus*  
670 *Pelagibacter ubique*”. *Appl Environ Microb* **74**: 4091-4100.  
671
- 672 36. Ryno LM, Genereux JC, Naito T, Morimoto RI, Powers ET, Shoulders MD *et al*  
673 (2014). Characterizing the altered cellular proteome induced by the stress-  
674 independent activation of heat shock factor 1. *ACS chemical biology* **9**: 1273-1283.  
675
- 676 37. Kim S, Sauer RT (2014). Distinct regulatory mechanisms balance DegP  
677 proteolysis to maintain cellular fitness during heat stress. *Genes & Development* **28**:  
678 902-911.  
679
- 680 38. Rosen R, Ron EZ (2002). Proteome analysis in the study of the bacterial heat-  
681 shock response. *Mass Spectrometry Reviews* **21**: 244-265.  
682
- 683 39. Squires C, Pedersen S, Ross B, Squires C (1991). ClpB is the *Escherichia coli*  
684 heat shock protein F84. 1. *J Bacteriol* **173**: 4254-4262.  
685



- 686 40. Haslbeck M, Vierling E (2015). A first line of stress defense: small heat shock  
687 proteins and their function in protein homeostasis. *Journal of molecular biology* **427**:  
688 1537-1548.  
689
- 690 41. Cziesielski MJ, Schmidt-Roach S, Aranda M (2019). The past, present, and future  
691 of coral heat stress studies. *Ecology and evolution* **9**: 10055-10066.  
692
- 693 42. Downs C, Fauth JE, Halas JC, Dustan P, Bemiss J, Woodley CM (2002).  
694 Oxidative stress and seasonal coral bleaching. *Free Radical Biology and Medicine* **33**:  
695 533-543.  
696
- 697 43. Chung C, Ives H, Almeda S, Goldberg A (1983). Purification from *Escherichia*  
698 *coli* of a periplasmic protein that is a potent inhibitor of pancreatic proteases. *J Biol*  
699 *Chem* **258**: 11032-11038.  
700
- 701 44. Clark EA, Walker N, Ford DC, Cooper IA, Oyston PC, Acharya KR (2011).  
702 Molecular recognition of chymotrypsin by the serine protease inhibitor ecotin from  
703 *Yersinia pestis*. *J Biol Chem* **286**: 24015-24022.  
704
- 705 45. Eggers CT, Murray IA, Delmar VA, Day AG, Craik CS (2004). The periplasmic  
706 serine protease inhibitor ecotin protects bacteria against neutrophil elastase.  
707 *Biochemical Journal* **379**: 107-118.  
708
- 709 46. Ireland PM, Marshall L, Norville I, Sarkar-Tyson M (2014). The serine protease  
710 inhibitor Ecotin is required for full virulence of *Burkholderia pseudomallei*. *Microbial*  
711 *pathogenesis* **67**: 55-58.  
712
- 713 47. Myint SL, Zlatkov N, Aung KM, Toh E, Sjöström A, Nadeem A *et al* (2021).  
714 Ecotin and LamB in *Escherichia coli* influence the susceptibility to Type VI  
715 secretion-mediated interbacterial competition and killing by *Vibrio cholerae*.  
716 *Biochimica et Biophysica Acta (BBA)-General Subjects* **1865**: 129912.  
717

- 718 48. Kotrba P, Inui M, Yukawa H (2001). Bacterial phosphotransferase system (PTS)  
719 in carbohydrate uptake and control of carbon metabolism. *J Biosci Bioeng* **92**: 502-  
720 517.  
721
- 722 49. Brady SK, Sreelatha S, Feng Y, Chundawat SP, Lang MJ (2015).  
723 Cellobiohydrolase 1 from *Trichoderma reesei* degrades cellulose in single cellobiose  
724 steps. *Nat Commun* **6**: 1-9.  
725
- 726 50. Wahlström N, Edlund U, Pavia H, Toth G, Jaworski A, Pell AJ *et al* (2020).  
727 Cellulose from the green macroalgae *Ulva lactuca*: isolation, characterization,  
728 optotracing, and production of cellulose nanofibrils. *Cellulose* **27**: 3707-3725.  
729
- 730 51. Wright RM, Strader ME, Genuise HM, Matz M (2019). Effects of thermal stress  
731 on amount, composition, and antibacterial properties of coral mucus. *PeerJ* **7**: e6849.  
732
- 733 52. Olivera ER, Luengo JM (2019). Steroids as environmental compounds recalcitrant  
734 to degradation: Genetic mechanisms of bacterial biodegradation pathways. *Genes* **10**:  
735 512.  
736
- 737 53. Hillyer KE, Dias DA, Lutz A, Wilkinson SP, Roessner U, Davy SK (2017).  
738 Metabolite profiling of symbiont and host during thermal stress and bleaching in the  
739 coral *Acropora aspera*. *Coral Reefs* **36**: 105-118.  
740
- 741 54. Akopian D, Shen K, Zhang X, Shan S-o (2013). Signal recognition particle: an  
742 essential protein-targeting machine. *Annual review of biochemistry* **82**: 693-721.  
743
- 744 55. von Loeffelholz O, Jiang Q, Ariosa A, Karuppasamy M, Huard K, Berger I *et al*  
745 (2015). Ribosome–SRP–FtsY cotranslational targeting complex in the closed state.  
746 *Proceedings of the National Academy of Sciences* **112**: 3943-3948.  
747
- 748 56. Zhang D, Sweredoski MJ, Graham RL, Hess S, Shan So (2012). Novel proteomic  
749 tools reveal essential roles of SRP and importance of proper membrane protein  
750 biogenesis. *Molecular & Cellular Proteomics* **11**.  
751

- 752 57. Fu Y-HH, Huang WY, Shen K, Groves JT, Miller T, Shan S-o (2017). Two-step  
753 membrane binding by the bacterial SRP receptor enable efficient and accurate Co-  
754 translational protein targeting. *Elife* **6**: e25885.  
755
- 756 58. Miyazaki R, Yura T, Suzuki T, Dohmae N, Mori H, Akiyama Y (2016). A novel  
757 SRP recognition sequence in the homeostatic control region of heat shock  
758 transcription factor  $\sigma$  32. *Scientific reports* **6**: 1-11.  
759
- 760 59. Sauerbrei B, Arends J, Schünemann D, Narberhaus F (2020). Lon protease  
761 removes excess signal recognition particle protein in Escherichia coli. *J Bacteriol*  
762 **202**: e00161-00120.  
763
- 764 60. Ulbrandt ND, Newitt JA, Bernstein HD (1997). The E. coli signal recognition  
765 particle is required for the insertion of a subset of inner membrane proteins. *Cell* **88**:  
766 187-196.  
767
- 768 61. Leplae R, Geeraerts D, Hallez R, Guglielmini J, Dreze P, Van Melderen L (2011).  
769 Diversity of bacterial type II toxin–antitoxin systems: a comprehensive search and  
770 functional analysis of novel families. *Nucleic Acids Res* **39**: 5513-5525.  
771
- 772 62. Yamaguchi Y, Inouye M (2011). Regulation of growth and death in Escherichia  
773 coli by toxin–antitoxin systems. *Nature Reviews Microbiology* **9**: 779-790.  
774
- 775 63. Ren D, Bedzyk L, Thomas S, Ye R, Wood TK (2004). Gene expression in  
776 Escherichia coli biofilms. *Appl Microbiol Biot* **64**: 515-524.  
777
- 778 64. Wang X, Kim Y, Hong SH, Ma Q, Brown BL, Pu M *et al* (2011). Antitoxin  
779 MqsA helps mediate the bacterial general stress response. *Nature chemical biology* **7**:  
780 359-366.  
781
- 782 65. Sberro H, Leavitt A, Kiro R, Koh E, Peleg Y, Qimron U *et al* (2013). Discovery  
783 of functional toxin/antitoxin systems in bacteria by shotgun cloning. *Molecular cell*  
784 **50**: 136-148.  
785

- 786 66. Vasanthakumar T, Rubinstein JL (2020). Structure and roles of V-type ATPases.  
787 *Trends in biochemical sciences* **45**: 295-307.  
788
- 789 67. Lolkema JS, Chaban Y, Boekema EJ (2003). Subunit composition, structure, and  
790 distribution of bacterial V-type ATPases. *Journal of bioenergetics and biomembranes*  
791 **35**: 323-335.  
792
- 793 68. Saijo S, Arai S, Hossain KM, Yamato I, Suzuki K, Kakinuma Y *et al* (2011).  
794 Crystal structure of the central axis DF complex of the prokaryotic V-ATPase.  
795 *Proceedings of the National Academy of Sciences* **108**: 19955-19960.  
796
- 797 69. Vasanthakumar T, Bueler SA, Wu D, Beilsten-Edmands V, Robinson CV,  
798 Rubinstein JL (2019). Structural comparison of the vacuolar and Golgi V-ATPases  
799 from *Saccharomyces cerevisiae*. *Proceedings of the National Academy of Sciences*  
800 **116**: 7272-7277.  
801
- 802 70. Yokoyama K, Imamura H (2005). Rotation, structure, and classification of  
803 prokaryotic V-ATPase. *Journal of bioenergetics and biomembranes* **37**: 405-410.  
804
- 805 71. Zhao J, Beyrakhova K, Liu Y, Alvarez CP, Bueler SA, Xu L *et al* (2017).  
806 Molecular basis for the binding and modulation of V-ATPase by a bacterial effector  
807 protein. *PLoS pathogens* **13**: e1006394.  
808
- 809 72. Murata T, Igarashi K, Kakinuma Y, Yamato I (2000). Na<sup>+</sup> Binding of V-type  
810 Na<sup>+</sup>-ATPase in *Enterococcus hirae*. *J Biol Chem* **275**: 13415-13419.  
811
- 812 73. Speelmans G, Poolman B, Abee T, Konings WN (1994). The F-or V-type Na (+)-  
813 ATPase of the thermophilic bacterium *Clostridium fervidus*. *J Bacteriol* **176**: 5160-  
814 5162.  
815
- 816 74. Toei M, Gerle C, Nakano M, Tani K, Gyobu N, Tamakoshi M *et al* (2007).  
817 Dodecamer rotor ring defines H<sup>+</sup>/ATP ratio for ATP synthesis of prokaryotic V-  
818 ATPase from *Thermus thermophilus*. *Proceedings of the National Academy of*  
819 *Sciences* **104**: 20256-20261.

820

821 75. Zhou L, Sazanov LA (2019). Structure and conformational plasticity of the intact  
822 *Thermus thermophilus* V/A-type ATPase. *Science* **365**.

823

824 76. Bove P, Russo P, Capozzi V, Gallone A, Spano G, Fiocco D (2013). *Lactobacillus*  
825 *plantarum* passage through an oro-gastro-intestinal tract simulator: carrier matrix  
826 effect and transcriptional analysis of genes associated to stress and probiosis.  
827 *Microbiological research* **168**: 351-359.

828

829 77. Roh H, Kim D-H (2021). Genotypic and Phenotypic Characterization of Highly  
830 Alkaline-Resistant *Carnobacterium maltaromaticum* V-Type ATPase from the Dairy  
831 Product Based on Comparative Genomics. *Microorganisms* **9**: 1233.

832

833 78. van den Nieuwboer M, van Hemert S, Claassen E, de Vos WM (2016).  
834 *Lactobacillus plantarum* WCFS 1 and its host interaction: a dozen years after the  
835 genome. *Microb Biotechnol* **9**: 452-465.

836

837 **Figure legend:**

838 **Fig.1 Experimental designs and setup.** (A) Experiment to identify differentially  
839 expressed proteins when the bacterial culture (*Endozoicomonas montiporae* CL-33<sup>T</sup>)  
840 was exposed to different heat stresses. (B) Setup for coral lysate experiment, where  
841 coral mucus and tissue were incubated with cultures of *E. montiporae* CL-33<sup>T</sup> for 9  
842 days, with temperature increased by 1°C per day (25°C to 33°C). (C) Overview of the  
843 different factors analyzed throughout the coral lysate experiment. \* denotes artificial  
844 sea water.

845 **Fig.2 Growth pattern and quantitative proteomics during heat stress.** (A) Growth  
846 curves of *Endozoicomonas montiporae* CL-33<sup>T</sup> at 25°C, 31°C, and 33°C in heat stress  
847 experiments. The quantitative proteomics analysis of heat stress experiments (B–F).  
848 (B) Hierarchical clustering and (C) nMDS ordination represent the similarity between  
849 the protein profiles from different samples. (D) The number of significantly changed  
850 proteins at each incubation time point at 31°C and 33°C. (E) Hierarchical clustering  
851 based heatmap visualization of the metabolism-related (from COG functional

852 categories) proteins that showed significantly changes in any one of the samples. The  
853 heatmap displays the relative protein abundance (z-score transformed) from low  
854 (blue) to high (yellow) per row. The columns represent three time points (16, 24, and  
855 48 h) at two incubation temperatures (31°C and 33°C). The significantly changed  
856 proteins were marked by a white circle. The right side of the image show the protein  
857 functions by category. Numbers in brackets indicate the number of proteins when  
858 there are multiple proteins in one category. **(F)** The number of proteins up-expression  
859 and down-expression in each incubation time at 31°C and 33°C.

860

861 **Fig.3 Quantitative proteomics analysis of coral lysate incubated with bacterial**  
862 **cultures at different temperatures. (A)** Hierarchical clustering and **(B)** nMDS  
863 ordination of different samples similarities. **(C)** The number of significantly changed  
864 proteins that were affected by coral lysate (25M/25S, 25T/25S, 33M/33S, and  
865 33T/33S) and temperature (33M/C2M, 33T/C2T, and 33S/C2S). **(D)** The number of  
866 proteins with increased and decreased expression in each comparison. **(E)**  
867 Hierarchical clustering heatmap visualization of the metabolism-related (from COG  
868 functional categories) proteins that have significantly changed in any of the three  
869 treatments (33M/C2M, 33T/C2T, and 33S/C2S). The heatmap displays the relative  
870 protein abundance (z-score transformed) from low (blue) to high (yellow) per row.  
871 The columns names (33M, 33T, and 33S) represent three treatments. Relative protein  
872 abundance (z-score transformed) is graded from low (blue) to high (yellow) in each  
873 row. The bracketed numbers represent the number of proteins if there are multiple  
874 proteins in a category. The significantly changed proteins are marked by a white  
875 circle.

876

877 **Fig.4 The quantitative proteomics analysis comparing the effects of different**  
878 **coral lysates (25M/25S, 25T/25S, 33M/33S, and 33T/33S). (A)** Bar plots on counts  
879 of significantly changed proteins. **(B)** The numbers of proteins with increased (black)  
880 and decreased (grey) expression. **(C)** The distributions of statistical significance (-  
881  $\log_{10}$  (*p*-values)) and magnitude of change ( $\text{Log}_2$  fold change) for all the proteins in

882 four different comparisons represented by volcano plots. The proteins for which there  
883 was no significant difference are marked in gray circles. Significantly changed  
884 proteins are marked in different colors based on different levels of  $\log_2$  fold change.  
885 (red:  $\log_2$  fold change  $> 1.5$ , orange:  $\log_2$  fold change  $> 1$ , and green:  $\log_2$  fold change  
886  $< 1$ ).  
887

Table 1. List of significantly changed proteins ( $p$ -value < 0.05) which have  $\log_2$  fold change >1 from the coral lysate comparisons. - : no significantly ( $p$ -value > 0.05) or the  $\log_2$  fold change <1.

| Protein name                                               | Log <sub>2</sub> fold change |         |         |         |
|------------------------------------------------------------|------------------------------|---------|---------|---------|
|                                                            | 25M/25S                      | 25T/25S | 33M/33S | 33T/33S |
| 30S ribosomal protein S20                                  | 2                            | -       | -       | -       |
| 50S ribosomal protein L20                                  | 1.73                         | -       | -       | -       |
| 50S ribosomal protein L16                                  | 1.64                         | -       | -       | -       |
| 30S ribosomal protein S2                                   | 1.22                         | -       | -       | -       |
| 50S ribosomal protein L5                                   | 1.2                          | -       | -       | -       |
| Signal recognition particle protein                        | 1.46                         | -       | -       | -       |
| V-type proton ATPase subunit E                             | 1.63                         | -       | -       | -       |
| mRNA interferase HigB                                      | 1.56                         | -       | -       | -       |
| Antitoxin HigA-2                                           | 1.42                         | -       | -       | -       |
| Na(+)-translocating NADH-quinone reductase subunit C       | 1.17                         | -       | -       | -       |
| Response regulator protein TodT                            | 1.14                         | -       | -       | -       |
| hypothetical protein                                       | 2.48                         | -       | -       | -       |
| hypothetical protein                                       | 2.21                         | -       | -       | -       |
| hypothetical protein                                       | 1.43                         | -       | -       | -       |
| Long-chain-fatty-acid--CoA ligase FadD15                   |                              | -1.26   | -       | -       |
| PTS system N,N'-diacetylchitobiose-specific EIIA component | -                            | -       | 1.29    | -       |
| 3-isopropylmalate dehydrogenase                            | -                            | -       | 1.16    | -       |
| 50S ribosomal protein L20                                  | -                            | -       | -       | 1.2     |
| hypothetical protein                                       | -                            | -       | -       | 1.25    |
| hypothetical protein                                       | -                            | -       | -       | 1.08    |
| hypothetical protein                                       | -                            | -       | -       | 1.05    |



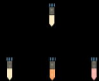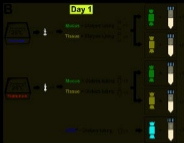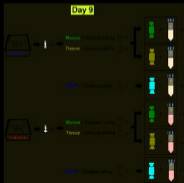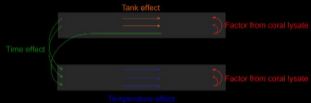

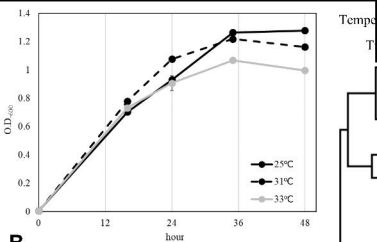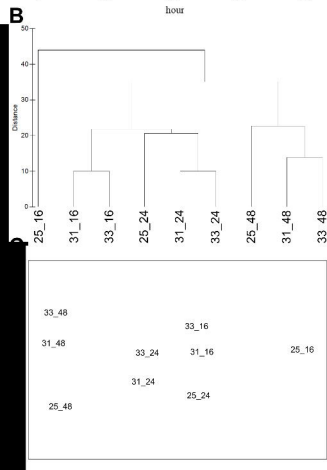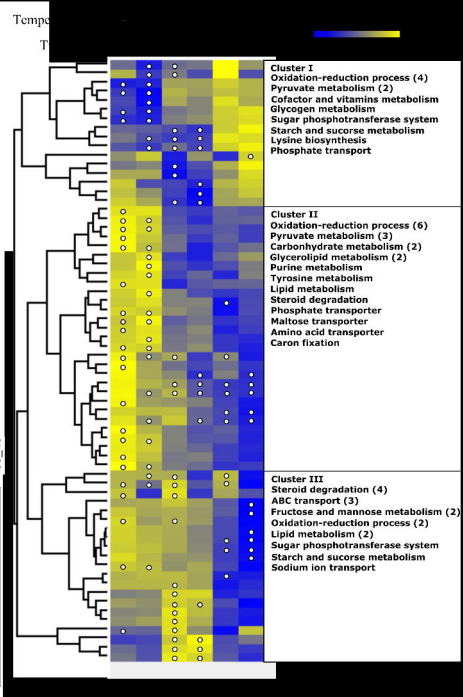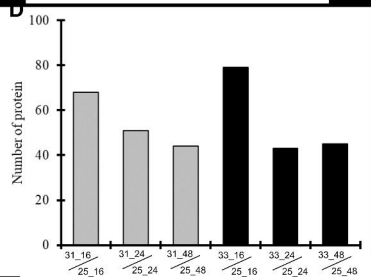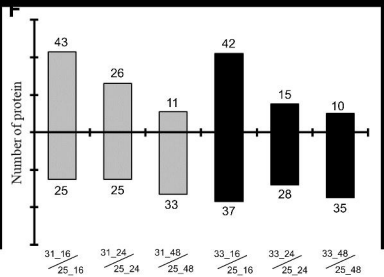

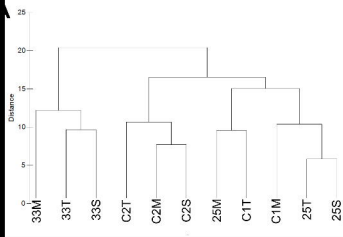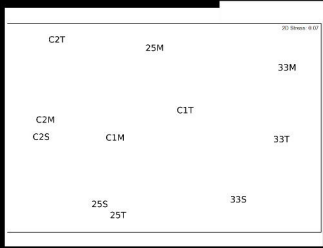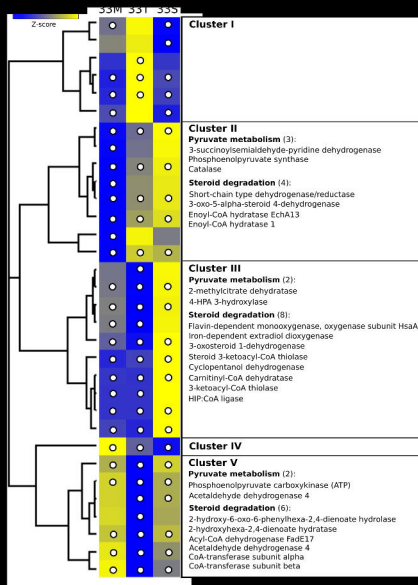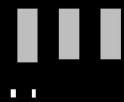

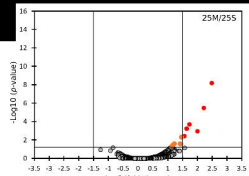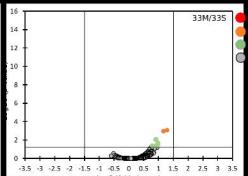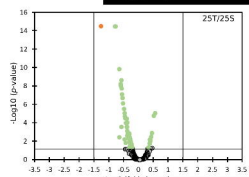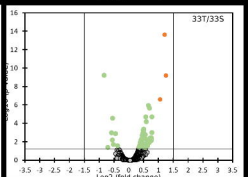

Source: https://www.biorxiv.org/content/10.1101/2021.09.27.461970v1.full.pdf
